# Supplementary material for: Safety and immunogenicity of the Na-GST-1 hookworm vaccine in Brazilian and American adults
Source: PubMed Central journal article supplement (PMC5441635; doi:10.1371/journal.pntd.0005574), 2017-05-02
Supplement: pntd.0005574.s002.pdf [file pntd.0005574.s002.pdf]

|                           | 10 µg Na-GST-1 |     |                 |     | 30 µg Na-GST-1 |     |                 |     | 100 µg Na-GST-1 |     |                 |     | HBV vaccine |     | Overall |     |
|---------------------------|----------------|-----|-----------------|-----|----------------|-----|-----------------|-----|-----------------|-----|-----------------|-----|-------------|-----|---------|-----|
|                           | + 0 µg GLA-AF  |     | + 2.5 µg GLA-AF |     | + 0 µg GLA-AF  |     | + 2.5 µg GLA-AF |     | + 0 µg GLA-AF   |     | + 2.5 µg GLA-AF |     | n=6         |     | N=102   |     |
| Sample size (n)           | n=16           |     | n=16            |     | n=16           |     | n=16            |     | n=16            |     | n=16            |     | n=6         |     | N=102   |     |
|                           | Mean           | SD  | Mean            | SD  | Mean           | SD  | Mean            | SD  | Mean            | SD  | Mean            | SD  | Mean        | SD  | Mean    | SD  |
| Age* (years)              | 30.4           | 8.2 | 27.5            | 9.1 | 28.3           | 7.7 | 25.1            | 5.4 | 25.6            | 7.4 | 29.4            | 7.3 | 29.2        | 8.6 | 27.8    | 7.7 |
| Gender** (% male)         | 50.0           |     | 68.8            |     | 43.8           |     | 37.5            |     | 43.8            |     | 50.0            |     | 33.3        |     | 48.0    |     |
| BMI* (kg/m <sup>2</sup> ) | 24.8           | 3.2 | 24.2            | 3.1 | 25.0           | 3.1 | 22.3            | 3.5 | 22.0            | 2.6 | 23.1            | 4.2 | 24.6        | 3.1 | 23.6    | 3.4 |

\* Presented as median (interquartile range).

\*\* Presented as number (percent) of male participants.
