# Supplementary material for: Safety and immunogenicity of the Na-GST-1 hookworm vaccine in Brazilian and American adults
Source: PubMed Central journal article supplement (PMC5441635; doi:10.1371/journal.pntd.0005574), 2017-05-02
Supplement: pntd.0005574.s003.pdf [file pntd.0005574.s003.pdf]

|                           | 10 µg Na-GST-1 |     |               |      | 30 µg Na-GST-1 |     |               |      | 100 µg Na-GST-1 |     |               |      | Overall |     |               |      |
|---------------------------|----------------|-----|---------------|------|----------------|-----|---------------|------|-----------------|-----|---------------|------|---------|-----|---------------|------|
|                           | + 0 µg GLA-AF  |     | + 1 µg GLA-AF |      | + 0 µg GLA-AF  |     | + 1 µg GLA-AF |      | + 5 µg GLA-AF   |     | + 0 µg GLA-AF |      |         |     | + 5 µg GLA-AF |      |
| Sample size (n)           | n=4            |     | n=8           |      | n=4            |     | n=8           |      | n=4             |     | n=4           |      | n=8     |     | N=40          |      |
|                           | Mean           | SD  | Mean          | SD   | Mean           | SD  | Mean          | SD   | Mean            | SD  | Mean          | SD   | Mean    | SD  | Mean          | SD   |
| Age* (years)              | 32.5           | 9.0 | 37.0          | 12.5 | 41.5           | 6.5 | 35.5          | 11.0 | 27.0            | 9.5 | 18.0          | 10.5 | 34.5    | 9.0 | 34.5          | 11.5 |
| Gender** (% male)         | 75.0           |     | 62.5          |      | 75.0           |     | 50.0          |      | 75.0            |     | 75.0          |      | 37.5    |     | 60.0          |      |
| BMI* (kg/m <sup>2</sup> ) | 31.4           | 3.5 | 30.9          | 7.8  | 29.7           | 2.9 | 31.8          | 8.0  | 31.9            | 6.3 | 27.0          | 5.1  | 33.7    | 9.0 | 31.3          | 6.8  |

\* Presented as median (interquartile range).

\*\* Presented as number (percent) of male participants.
